# Supplementary material for: Stem cell factor Sox2 and its close relative Sox3 have differentiation functions in oligodendrocytes
Source: PubMed Central journal article supplement — Development. 2014 Jan 1;141(1):39–50. doi: 10.1242/dev.098418 (PMC3865748; doi:10.1242/dev.098418), 2014-01-01
Supplement: supp_dev.098418_DEV098418.pdf [file supp_dev.098418_DEV098418.pdf]

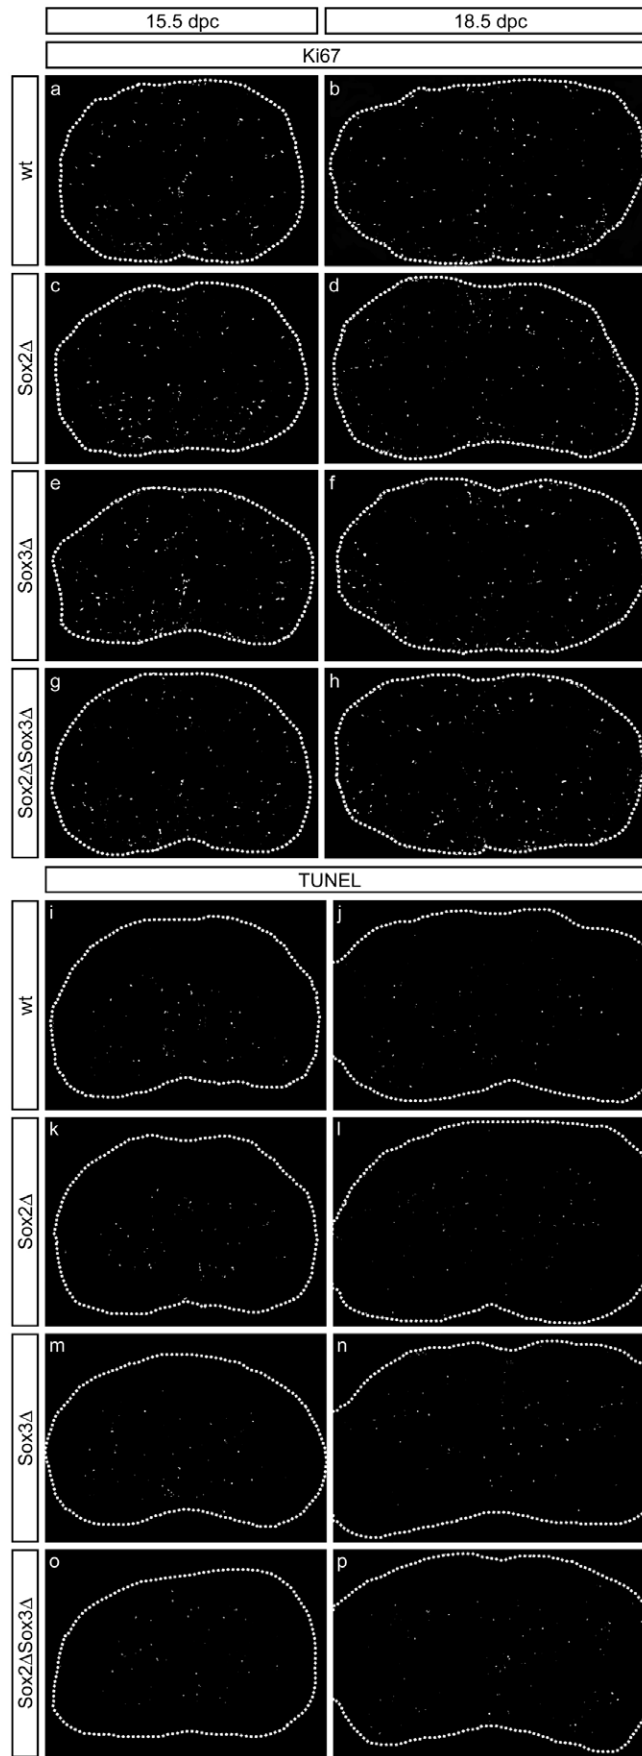

**Fig. S1. Sox2 and Sox3 have no effect on proliferation and apoptosis.** (A-H) Immunohistochemistry was performed on transverse sections of wildtype (wt) (A,B), *Sox2<sup>ΔSox10</sup>* (Sox2Δ) (C,D), *Sox3<sup>ΔSox10</sup>* (Sox3Δ) (E,F), and *Sox2<sup>ΔSox10</sup>Sox3<sup>ΔSox10</sup>* (Sox2ΔSox3Δ) (G,H) SC at 15.5 dpc (A,C,E,G) and 18.5 dpc (B,D,F,H) with antibodies against Ki67. (I-P) TUNEL assay was performed on transverse sections of wildtype (wt) (I,J), *Sox2<sup>ΔSox10</sup>* (Sox2Δ) (K,L), *Sox3<sup>ΔSox10</sup>* (Sox3Δ) (M,N), and *Sox2<sup>ΔSox10</sup>Sox3<sup>ΔSox10</sup>* (Sox2ΔSox3Δ) (O,P) SC at 15.5 dpc (I,K,M,O) and 18.5 dpc (J,L,N,P).

**Table S1. Primers**

| <b>primer application</b>                                              | <b>primer sequence</b>                                                        |
|------------------------------------------------------------------------|-------------------------------------------------------------------------------|
| <b>generation of luciferase reporter plasmids</b>                      |                                                                               |
| <i>Gm16908</i> promoter (pos. 97697-98154 of AC115691.8)               | 5'-GCTGAAGAAACGAGCCTGG-3'<br>5'-GGAAGACACCAGTTGAGTTAAAGCT-3'                  |
| <i>Sox2</i> -3'UTR (pos. 1324-2323 of NM_001109181.1)                  | 5'-GGGCCGGACCGCGAACTG-3'<br>5'-GCACAGTTTGAGATAAATAAA<br>TTTTGAAATATGGACTGA-3' |
| <i>Sox10</i> -3'UTR (pos. 1983-3029 of NM_019193.2)                    | 5'-AGGGGCCCTGTCACCATT-3'<br>5'-CAAAGCTTCTGGTTGCCTGC-3'                        |
| <i>Sox9</i> -3'UTR (pos. 100969922-100970221 of ENSRNOG00000002607)    | 5'-GTGCATCCTTGTGGGTCC-3'<br>5'-TTATTTCACTGCTGTGGTTGG-3'                       |
| <i>Myrf</i> -3'UTR (pos. 4823-5129 of NM_001170487.1)                  | 5'-TCACGCTTGCCTTCTGACC-3'<br>5'-AGGGGGTCGACCTTGGAC-3'                         |
| <i>Med12</i> -3'UTR (pos. 7647-8418 of NM_021521.2)                    | 5'-CCTTAGGCCCTCAATCCAAG-3'<br>5'-GGTCTCAAGCTTTGCCGATA-3'                      |
| <b>generation of expression plasmids</b>                               |                                                                               |
| <i>miR145</i> plus flanking regions (pos. 115606-116207 of AC115691.8) | 5'-AGGACTGGTCCCAAATGC-3'<br>5'-CACAGACCCACATCCACAC-3'                         |
| <b>qPCR</b>                                                            |                                                                               |
| <i>Sox9</i> (pos. 993-1193 of XM_001081628.3)                          | 5'-CTCCTCCTCGGGCATGAGT-3'<br>5'-CTGCTCAGCTCACCGATGT-3'                        |
| <i>Rpl8</i> (pos. 307-669 of NM_012053.2)                              | 5' GTTCGTGTACTGCGGCAAGA 3'<br>5' ACAGGATTCATGGCCACACC 3'                      |
| <b>ChIP PCR</b>                                                        |                                                                               |
| <i>Mbp</i> promoter fragment (chr18:78473074-78473327)                 | 5'-CTCGCACAGGCCACATTC-3'<br>5'-CTGAAGCTCGTCGGACTCTG-3'                        |
| distal <i>Mbp</i> control region (chr18:78469811-78470107)             | 5'-CAGGGAACTTAAGGAGGAG-3'<br>5'-GGACATGTGTGTAGTTTCTAG-3'                      |
